# Supplementary material for: Rapid cloning-free mutagenesis of new SARS-CoV-2 variants using a novel reverse genetics platform
Source: eLife journal article supplement (doi:10.7554/elife.89035), 2023-08-11
Supplement: supp1 [file elife-89035-supp1-v1.pdf]

## Supplementary File 1. Infectivity assessment of recombinant virus on Vero E6 cells.

| Number of fragments | Transfection method | Name                     | Cell line transfected | 3 days post infection on Vero E6                                                     | Description                                        |
|---------------------|---------------------|--------------------------|-----------------------|--------------------------------------------------------------------------------------|----------------------------------------------------|
| -                   | -                   | Vero E6 negative control | -                     | 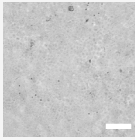   | Uninfected Vero E6 cells.                          |
| 8                   | electroporation     | rCoV2-8fr                | HEK293T               |    | Rescue from eight fragments.                       |
| 4                   | electroporation     | rCoV2-4fr                | HEK293T               |    | Rescue from four fragments.                        |
| 4                   | electroporation     | rCoV2-293                | HEK293                |    | Rescue from HEK293.                                |
| 4                   | electroporation     | rCoV2-CHO                | CHO                   |  | Rescue from CHO.                                   |
| 4                   | electroporation     | rCoV2-BHK                | BHK-21                |  | Rescue from BHK-21.                                |
| 4                   | electroporation     | rCoV2-A549               | A549-ACE2             |  | Rescue from A549-ACE2.                             |
| 4                   | jetPRIME            | rCoV2-jP                 | HEK293T               |  | Rescue after transfection with jetPRIME.           |
| 4                   | Lipofectamine-3000  | rCoV2-3000               | HEK293T               |  | Rescue after transfection with Lipofectamine-3000. |
| 4                   | Lipofectamine-LTX   | rCoV2-LTX                | HEK293T               |  | Rescue after transfection with Lipofectamine-LTX.  |

|   |                 |                                            |         |                                                                                      |                                                                                                                              |
|---|-----------------|--------------------------------------------|---------|--------------------------------------------------------------------------------------|------------------------------------------------------------------------------------------------------------------------------|
| 5 | electroporation | rCoV2-500bp                                | HEK293T | 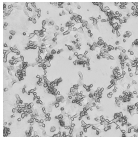   | Rescue including one fragment to be only 500 bp in length.                                                                   |
| 5 | electroporation | Wuhan <sup>BA.1 S</sup>                    | HEK293T |    | Chimeric virus, Omicron BA.1 S gene in the background of Wuhan.                                                              |
| 5 | electroporation | Wuhan <sup>BA.5 S</sup>                    | HEK293T |    | Chimeric virus, Omicron BA.5 S gene in the background of Wuhan.                                                              |
| 5 | electroporation | rCoV2-N501Y                                | HEK293T |    | Direct mutagenesis, incorporation of N501Y substitution in the S gene.                                                       |
| 5 | electroporation | rCoV2-G614D                                | HEK293T |    | Direct mutagenesis, incorporation of G614D substitution in the S gene.                                                       |
| 5 | electroporation | rCoV2-ΔORF3a                               | HEK293T |  | Direct mutagenesis, deletion of ORF3a.                                                                                       |
| 5 | electroporation | rCoV2-ORF8-FLAG                            | HEK293T |  | Direct mutagenesis, incorporation of a 3x-FLAG tag at the C-terminal of ORF8.                                                |
| 9 | electroporation | rCoV2-link-Wuhan                           | HEK293T |  | Rescue from RNA directly using the linker fragment.                                                                          |
| 9 | electroporation | rCoV2-link-Omicron BA.5 <sup>BA.1 S</sup>  | HEK293T |  | Rescue of chimeric virus from RNA directly using the linker fragment. Omicron BA.1 S gene in the background of Omicron BA.5. |
| 9 | electroporation | rCoV2-link-Omicron BA.1 <sup>BA.5 S</sup>  | HEK293T |  | Rescue of chimeric virus from RNA directly using the linker fragment. Omicron BA.5 S gene in the background of Omicron BA.1. |
| 9 | electroporation | rCoV2-link-Omicron BA.5 <sup>Wuhan S</sup> | HEK293T |  | Rescue of chimeric virus from RNA directly using the linker fragment. Wuhan S gene in the background of Omicron BA.5.        |
