# Supplementary material for: Rapid cloning-free mutagenesis of new SARS-CoV-2 variants using a novel reverse genetics platform
Source: eLife. 2023 Nov 21;12:RP89035. doi: 10.7554/eLife.89035 (PMC10662946; doi:10.7554/eLife.89035)
Supplement: Supplementary file 2. — Mutations with a relative abundance of >10% in the entire virus population are listed. Ambiguities or low coverage are highlighted in italics. [file elife-89035-supp2.xlsx]

## Sheet: Sheet1
Supplementary File 2. Genomic characterization of recombinant SARS-CoV-2 virus based on NGS data.
Mutations with a relative abundance of > 10 % in the entire virus population are listed. Ambiguities or low coverage are highlighted in italics.
ID	position							"N" reads*				origin of template
	13551	21003*	21621*	21638*	25768*	28540*	28967*
1		K	M	Y	M							T15324C
2			M	Y	M			5979, 9628, 9629, 20231, 20525, 20526				T15324Y
3			M	Y	M	M	M					T15324Y
4			M	Y	M	M						T15324Y
5			M	Y	M	M		5979, 5980, 9628, 9629, 20525, 21002, 21003
6		K	M	Y	M	M	M	5979, 5980, 9628, 9629, 20525, 20526				T15324Y
7	C to T (13 %)		M	Y	M	M		9628, 9629				T15324Y
8		K	M	Y	M	M		5979, 9628, 9629, 20231, 20232, 20526				T15324Y
	ORF1ab		S		ORF3a	N
	* Ambiguities or "N" stretches occuring as clusters were not considered as a randomly introduced mutation during the PCR-amplification step but rather as technical artefact or culture adaptation of the virus.
ID	position
	29**	30**	79	259	263	264	550	12464
clonal 1
clonal 2	A to G	A to G	A to G	A to G	A to G	A to G	A to G
clonal 3
clonal 4
clonal 5								G to T
	5'UTR						ORF1ab
	** low coverage (20 reads)
ID	position
	3561	5834	6067	18750	18897	19097	20429	20763	20855	20881	21137	21777	25101	27787	28720
RNA clonal 1		T to C		T to C							A to G		A to G	T del	C to T
RNA clonal 2							C to T	A to G	G to C	G to A
RNA clonal 3	T to C		T to G		T to C	C to T						G to A
	ORF1ab											S		ORF7b	N
