# Supplementary material for: Rapid cloning-free mutagenesis of new SARS-CoV-2 variants using a novel reverse genetics platform
Source: eLife. 2023 Nov 21;12:RP89035. doi: 10.7554/eLife.89035 (PMC10662946; doi:10.7554/eLife.89035)
Supplement: Supplementary file 3. — Length, GC content, and the hypothetical annealing temperature (according to OligoCalc, salt-adjusted) are listed. Note that homology regions were chosen independently from GC content or annealing temperature and values are only listed for completion. [file elife-89035-supp3.xlsx]

## Sheet: Sheet1
Supplementary File 3. Homology regions successfully used for recombinant SARS-CoV-2, CHIKV, and DENV1/DENV3.
Length, GC content, and the hypothetical annealing temperature (according to OligoCalc, salt-adjusted) are listed. Note that homology regions were chosen independently from GC content or annealing temperature and values are only listed for completion.
	Length (bp)	G/C (%)	Annealing (C°)	Sequence
SARS-CoV-2	100	30	83	GCACTTAAGGGTGGTAAAATTGTTAATAATTGGTTGAAGCAGTTAATTAAAGTTACACTTGTGTTCCTTTTTGTTGCTGCTATTTTCTATTTAATAACAC
	100	38	86.3	TATAACTCAAATGAATCTTAAGTATGCCATTAGTGCAAAGAATAGAGCTCGCACCGTAGCTGGTGTCTCTATCTGTAGTACTATGACCAATAGACAGTTT
	100	43	88.3	TACAGCTGTTTTAAGACAGTGGTTGCCTACGGGTACGCTGCTTGTCGACTCAGATCTTAATGACTTTGTCTCTGATGCAGATTCAACTTTGATTGGTGAT
	102	35	85.2	TGTGTTGAAGAAGTTACAACAACTCTGGAAGAAACTAAGTTCCTCACAGAAAACTTGTTACTTTATATTGACATTAATGGCAATCTTCATCCAGATTCTGCC
	93	43	87.7	CACAGGGACTACTCCCACCCAAGAATAGCATAGATGCCTTCAAACTCAACATTAAATTGTTGGGTGTTGGTGGCAAACCTTGTATCAAAGTAG
	107	36	86	TTTACAAGTCTTGAAATTCCACGTAGGAATGTGGCAACTTTACAAGCTGAAAATGTAACAGGACTCTTTAAAGATTGTAGTAAGGTAATCACTGGGTTACATCCTAC
	100	45	89.2	CAGTCAGCACCTCATGGTGTAGTCTTCTTGCATGTGACTTATGTCCCTGCACAAGAAAAGAACTTCACAACTGCTCCTGCCATTTGTCATGATGGAAAAG
	100	46	89.6	GGAACTGTAACTTTGAAGCAAGGTGAAATCAAGGATGCTACTCCTTCAGATTTTGTTCGCGCTACTGCAACGATACCGATACAAGCCTCACTCCCTTTCG
	100	34	84.6	CCACGCGAACAAATAGATGGTTATGTCATGCATGCAAATTACATATTTTGGAGGAATACAAATCCAATTCAGTTGTCTTCCTATTCTTTATTTGACATGA
	102	37	86	TGCTAGGGAGAGCTGCCTATATGGAAGAGCCCTAATGTGTAAAATTAATTTTAGTAGTGCTATCCCCATGTGATTTTAATAGCTTCTTAGGAGAATGACAAA
	119	40	88.4	GTTTAGTGAACCGTATATTAGGTTTATACCTTCCCAGGTAACAAACCAACCAACTTTCGATCTCTTGTAGATCTGTTCTCTAAACGAACTTTAAAATCTGTGTGGCTGTCACTCGGCTG
	100	34	84.6	AAGGTTTTAATTGTTACTTTCCTTTACAATCATATGGTTTCCAACCCACTAATGGTGTTGGTTACCAACCATACAGAGTAGTAGTACTTTCTTTTGAACT
	80	43	86.3	AACACCAGGAACAAATACTTCTAACCAGGTTGCTGTTCTTTATCAGGGTGTTAACTGCACAGAAGTCCCTGTTGCTATTC
	100	43	88.3	ACGACTCTGAGCCAGTGCTCAAAGGAGTCAAATTACATTACACATAAGCACAAGCTGATGAGTACGAACTTATGTACTCATTCGTTTCGGAAGAGACAGG
	84	43	86.8	GGCGGAGGTGGTTCTGACTACAAAGACCATGACGGTGATTATAAAGATCATGACATCGATTACAAGGATGACGATGACAAGTAA
CHIKV	100	52	92	CCTGTGTACTCGCCTCCGATCAACGTCCGATCGTCCAATCCCGAGTCCGCTGTGGCAGCATGCAATGAGTTCTTAGCTAGAAACTATCCAACTGTCTCAT
	126	56	95.4	CGTGCAGAGCACCGCCGCAACTACCGAAGAGATAGAGGTACACATGCCCCCAGACACCCCTGATCGCACATTAATGTCACAACAGTCCGGCAACGTAAAGATCACAGTCAATGGCCAGACGGTGCG
	100	31	83.4	AGGGACGTAGGAGATGTTATTTTGTTTTTAATATTTCAAAAAAAAAAAAAAAAAAAAAAAAAAAAAAAAAAAAGGCCGGCATGGTCCCAGCCTCCTCGCT
	110	51	92.4	GGCGTGTACGGTGGGAGGTCTATATAAGCAGAGCTCGTTTAGTGAACCGTATGGCTGCGTGAGACACACGTAGCCTACCAGTTTCTTACTGCTCTACTCTGCAAAGCAAG
DENV	100	50	91.2	GGCGTGTACGGTGGGAGGTCTATATAAGCAGAGCTCGTTTAGTGAACCGAGTTGTTAGTCTACGTGGACCGACAAGAACAGTTTCGAATCGGAAGCTTGC
	100	59	94.9	TCACCGATCCAGCCAGCATAGCGGCCAGAGGGTACATCTCAACCCGAGTTGGCATGGGTGAAGCAGCTGCGATCTTCATGACAGCCACTCCCCCAGGATC
	100	53	92.4	TGACAGCCACTCCCCCAGGATCGGTGGAGGCCTTTCCACAGAGCAATGCCGTTATCCAAGATGAGGAAAGAGACATTCCTGAGAGATCATGGAACTCAGG
	100	36	85.5	CCAGAAAATGGAATGGTGCTGTTGAATCAACAGGTTCTAAAAAAAAAAAAAAAAAAAAAAAAAAAAAAAAAAAGGCCGGCATGGTCCCAGCCTCCTCGCT
	100	51	91.6	GGCGTGTACGGTGGGAGGTCTATATAAGCAGAGCTCGTTTAGTGAACCGAGTTGTTAGTCTACGTGGACCGACAAGAACAGTTTCGACTCGGAAGCTTGC
	100	47	90	CTTGATGCCCGCACTTATTCAGATCCCTTAGCACTCAAGGAATTCAAGGACTTTGCGGCCGGTAGAAAGTCAATCGCCCTTGATCTTGTGACAGAAATAG
	100	36	85.5	CCAGAAAATGGAATGGTGCTGTTGAATCAACAGGTTCTAAAAAAAAAAAAAAAAAAAAAAAAAAAAAAAAAAAGGCCGGCATGGTCCCAGCCTCCTCGCT
