# Supplementary material for: Rapid cloning-free mutagenesis of new SARS-CoV-2 variants using a novel reverse genetics platform
Source: eLife. 2023 Nov 21;12:RP89035. doi: 10.7554/eLife.89035 (PMC10662946; doi:10.7554/eLife.89035)
Supplement: Supplementary file 4. [file elife-89035-supp4.xlsx]

## Sheet: Sheet1
Supplementary File 4. Sanger sequencing data of the region of interest for the generated mutant rSARS-CoV-2, rCHIKV, and rDENV1/rDENV3.
	Mutation/ Region	Sequence
SARS-CoV-2	Wuhan(BA.1 S) S	ATGGCAGATTCCAACGGTACTATTACCGTTGAAGAGCTTAAAAAGCTCCTTGAACAATGG
	Wuhan(BA.1 S) M	GGTAACAAACCTTGTAATGGTGTTGCAGGTTTTAATTGTTACTTTCCTTTACGATCATATAGTTTCCGACCCACTTATGGTGTTGGTCAC
	Wuhan(BA.5 S) S	ATGGCAGATTCCAACGGTACTATTACCGTTGAAGAGCTTAAAAAGCTCCTTGAACAATGG
	Wuhan(BA.5 S) M	GGTAACAAACCTTGTAATGGTGTTGCAGGTGTTAATTGTTACTTTCCTTTACGATCATATGGTTTCCAACCCACTTATGGTGTTGGTCAC
	rCOV2-N501Y	TACTTTCCTTTACAATCATATGGTTTCCAACCCACTTATGGTGTTGGTTACCAACCATACAGAGTAGTAGTACTTTCTTTTGAACTTCTACATGCACCAGCAACTGTTTGT
	rCOV2-N501Y p5	TACTTTCCTTTACAATCATATGGTTTCCAACCCACTTATGGKGTTGGTTACCACCCATACAGAGTAGTAGTACTTTCTTTTGAACTTCTACATGCACCAGCAACTGTTTGT
	rCOV2-G614D	CCAGGAACAAATACTTCTAACCAGGTTGCTGTTCTTTATCAGGATGTTAACTGCACAGAAGTCCCTGTTGCTATTCATGCAGATCAACTTACTCCTACTTGGCGTGTT
	rCOV2-G614D p5	CCAGGAACAAATACTTCTAACCAGGTTGCTGTTCTTTATCAGGATGTTAACTGCACAGAAGTCCCTGTTGCTATTCATGCAGATCAACTTACTCCTACTTGGCGTGTT
	rCOV2-ΔORF3a	GACTCTGAGCCAGTGCTCAAAGGAGTCAAATTACATTACACATAAGCACAAGCTGATGAGTACGAACTTATGTACTCATTCGTTTCGGAAGAGACAGGTACGTTAATAGTTAATAGCGTACTTCTTTTT
	rCOV2-ORF8-FLAG	ATGAAATTTCTTGTTTTCTTAGGAATCATCACAACTGTAGCTGCATTTCACCAAGAATGTAGTTTACAGTCATGTACTCAACATCAACCATATGTAGTTGATGACCCGTGTCCTATTCACTTCTATTCTAAATGGTATATTAGAGTAGGAGCTAGAAAATCAGCACCTTTAATTGAATTGTGCGTGGATGAGGCTGGTTCTAAATCACCCATTCAGTACATCGATATCGGTAATTATACAGTTTCCTGTTTACCTTTTACAATTAATTGCCAGGAACCTAAATTGGGTAGTCTTGTAGTGCGTTGTTCGTTCTATGAAGACTTTTTAGAGTATCATGACGTTCGTGTTGTTTTAGATTTCATCGGCGGAGGTGGTTCTGACTACAAAGACCATGACGGT…
	rCoV2-link-Omicron BA.1(BA.5 S) S	GGTAACAAACCTTGTAATGGTGTTGCAGGTGTTAATTGTTACTTTCCTTTACAATCATATGGTTTCCGACCCACTTATGGTGTTGGTCAC
	rCoV2-link-Omicron BA.1(BA.5 S) M	ATGGCAGGTTCCAACGGTACTATTACCGTTGAAGAGCTTAAAAAGCTCCTTGAAGAATGG
	rCoV2-link-Omicron BA.5(BA.1 S) S	GGTAACAAACCTTGTAATGGTGTTGCAGGTTTTAATTGTTACTTTCCTTTACGATCATATAGTTTCCGACCCACTTATGGTGTTGGTCAC
	rCoV2-link-Omicron BA.5(BA.1 S) M	ATGGCAAATTCCAACGGTAYTATTACCGTTGAAGAGCTTAAAAAGCTCCTTGAAGAATGG
	rCoV2-link-Omicron BA.5(Wuhan S) S	GGTAGCACACCTTGTAATGGTGTTGAAGGTTTTAATTGTTACTTTCCTTTACATTCATATGGTTTCCAACCCACTAATGGTGTTGGTTAC
	rCoV2-link-Omicron BA.5(Wuhan S) M	ATGGCAAATTCCAACGGTACTATTACCGTTGAAGAGCTTAAAAAGCTCCTTGAAGAATGG
	BA.5 ΔORF3	ACGACTCTGAGCCAGTGCTCAAAGGAGTCAAATTACATTACACATAAGCACAAGCTGATGAGTACGAACTTATGTACTCATTCGTTTCGGAAGAGATAGGTACGTTAATA
	BA.5 ΔORF3 M	ATGGCAAATTCCAACGGTACTATTACCGTTGAAGAGCTTAAAAAGCTCCTTGAAGAATGG
	XBB ΔORF3	ACGACTCTGAGCCAGTGCTCAAAGGAGTCAAATTACATTACACATAAGCACAAGCTGATGAGTACGAACTTATGTACTCATTCGTTTCGGAAGAGATAGGTGCGTTAATAAAT
	XBB ΔORF3 M	ATGGCAGATTCCAACGGTACTATTACCGTTGAAGAGCTTAAAAAGCTCCTTGAAGAATGG
CHIKV	rCHIKV	GCGCCTGTGTACTCGCCTCCGATCAACGTCCGATTGTCCAATCCCGAGTCCGCTGTGGCAGCATGCAATGAGTTCTTAGCTAGAAACTATCCAACTGTCTCATCATACCAAATTACCGACGAGTATGATGCATATCTAGACATGGTGGACGGGTCGGAGAGTTGCCTGGACCGAGCGACATTCAATCCGTCAAAACTCAGGAGCTACCCGAAACAGCACGCTTACCACGCGCCCTCCATCAGAAGCGCTG
	CHIKV control	GCGCCTGTGTACTCGCCTCCGATCAACGTCCGATTGTCCAATCCCGAGTCCGCAGTGGCAGCATGCAATGAGTTCTTAGCTAGAAACTATCCAACTGTCTCATCATACCAAATTACCGACGAGTATGATGCATATCTAGACATGGTGGACGGGTCGGAGAGTTGCCTGGACCGAGCGACATTCAATCCGTCAAAACTCAGGAGCTACCCGAAACAGCACGCTTACCACGCGCCCTCCATCAGAAGCGCTG
DENV	rDENV1 A	TACCGATCCAGCTAGCATAGCGGCCAGAGGGTACATCTCAACCCGAGTGGGCATGGGTGAAGCAGCTGCGATCTTTATGACAGCCACTCCCCCAGGATCGGTGGAGGCCTTTCCACAGAGCAATGCCGTTATCCAAGATGAGGAAAGAGACATTCCTGAGAGATCATGGAACTCAGGCTACGACTGGATCACTGACTTTCCAGGTAAAACAGTCTGGTTTGTTCCAAGCATCAAG
	DENV1 control	TACCGATCCAGCTAGCATAGCGGCCAGAGGGTACATCTCAACCCGAGTGGGCATGGGTGAAGCAGCTGCGATCTTTATGACAGCCACTCCCCCAGGATCGGTGGAGGCCTTTCCACAGAGCAATGCAGTCATCCAAGATGAGGAAAGAGACATTCCTGAGAGATCATGGAACTCAGGCTACGACTGGATCACTGACTTTCCAGGTAAAACAGTCTGGTTTGTTCCAAGCATCAAG
	rDENV1 B	TATGGATGAAGCACATTTTACCGATCCAGCCAGCATAGCGGCCAGAGGGTACATCTCAACCCGAGTTGGCATGGGTGAAGCAGCTGCGATCTTTATGACAGCCACTCCCCCAGGATCGGTGGAGGCCTTTCCACAGAGCAATGCAGTCATCCAAGATGAGGAAAGAGACATTCCTGAGAGATCATGGAACTCAGGCTACGACTGGATCACTGACTTTCCAGGTAAAACAGTCTGGTTTGTTCCAAGCATCAAG
	rDENV3	GTAGCATCAGAAGGGATCAAATATACAGATAGGAAATGGTGCTTTGATGGACAGCGCAACAACCAAATTTTAGAGGAAAACATGGACGTGGAAATCTGGACAAAGGAAGGAGAAAAGAAAAAATTAAGACCTAGGTGGCTTGATGCCCGCACTTATTCAGATCCCTTAGCACTCAAGGAATTCAAGGACTTTGCGGCCGGTAGAAAGTCAATCGCCCTTGATCTTGTGACAGAAATAGGAAGAGTGCCTTCACACCTAGCCCACAGAACGAGAAACGCTCTGGACAATT
	DENV3 control	GTAGCATCAGAAGGGATCAAATATACAGATAGGAAATGGTGCTTTGATGGACAGCGCAACAACCAAATTTTAGAGGAAAACATGGACGTGGAAATCTGGACAAAGGAAGGAGAAAAGAAAAAATTAAGACCTAGGTGGCTTGATGCCCGCACTTATTCAGATCCCTTAGCACTCAAGGAATTCAAGGACTTTGCGGCTGGTAGAAAGTCAATCGCCCTTGATCTTGTGACAGAAATAGGAAGAGTGCCTTCACACCTAGCCCACAGAACGAGAAACGCTCTGGACAATT
