# Supplementary material for: Rapid cloning-free mutagenesis of new SARS-CoV-2 variants using a novel reverse genetics platform
Source: eLife. 2023 Nov 21;12:RP89035. doi: 10.7554/eLife.89035 (PMC10662946; doi:10.7554/eLife.89035)
Supplement: Supplementary file 5. [file elife-89035-supp5.xlsx]

## Sheet: Sheet1
Supplementary File 5. Oligonucleotide list.
	Fragment	Primer	Sequence 5’ to 3’	Amplicon Size (bp)
SARS-CoV-2	A1	F CMV	CGATGTACGGGCCAGATATACG	4694
		R A1-A2	GGCAGAATCTGGATGAAGATTGCC
	A2	F A2-A1	TGTGTTGAAGAAGTTACAACAACTCTG	4672
		R A-B	GTGTTATTAAATAGAAAATAGCAGCAACAAAAAGGAACACAAGTGTAACTTTAATTAACTGCTTCAACC
	B1	F B-A	GCACTTAAGGGTGGTAAAATTGTTAATAATTGGTTGAAGCAGTTAATTAAAGTTACACTTGTGTTCC	3292
		R B1-B2	CTACTTTGATACAAGGTTTGCCACC
	B2	F B2-B1	CACAGGGACTACTCCCACCC	3415
		R B-C	AAACTGTCTATTGGTCATAGTACTACAGATAGAGACACCAGCTACGGTGCGAGCTCTATTCTTTGCAC
	C1	F C-B	TATAACTCAAATGAATCTTAAGTATGCCATTAGTGCAAAGAATAGAGCTCGCACCGTAGCTGGTG	3048
		R C1-C2	GTAGGATGTAACCCAGTGATTACC
	C2	F C2-C1	TTTACAAGTCTTGAAATTCCACGTAGG	3006
		R C-D	ATCACCAATCAAAGTTGAATCTGCATCAGAGACAAAGTCATTAAGATCTGAGTCGACAAGCAGCG
	D1	F D-C	TACAGCTGTTTTAAGACAGTGGTTGCCTACGGGTACGCTGCTTGTCGACTCAGATCTTAATGACTTTGTC	4622
		R D1-D2	CGAAAGGGAGTGAGGCTTGTATC
	D2	F D2-D1	GGAACTGTAACTTTGAAGCAAGGTG	4707
		R SV40	GCGGCCGCCAGACATGATAAG
	A	F CMV	CGATGTACGGGCCAGATATACG	9264
		R A-B	GTGTTATTAAATAGAAAATAGCAGCAACAAAAAGGAACACAAGTGTAACTTTAATTAACTGCTTCAACC
	B	F B-A	GCACTTAAGGGTGGTAAAATTGTTAATAATTGGTTGAAGCAGTTAATTAAAGTTACACTTGTGTTCC	6614
		R B-C	AAACTGTCTATTGGTCATAGTACTACAGATAGAGACACCAGCTACGGTGCGAGCTCTATTCTTTGCAC
	C	F C-B	TATAACTCAAATGAATCTTAAGTATGCCATTAGTGCAAAGAATAGAGCTCGCACCGTAGCTGGTG	5947
		R C-D	ATCACCAATCAAAGTTGAATCTGCATCAGAGACAAAGTCATTAAGATCTGAGTCGACAAGCAGCG
	D	F D-C	TACAGCTGTTTTAAGACAGTGGTTGCCTACGGGTACGCTGCTTGTCGACTCAGATCTTAATGACTTTGTC	9229
		R SV40	GCGGCCGCCAGACATGATAAG
	D1 614	F D-C	TACAGCTGTTTTAAGACAGTGGTTGCCTACGGGTACGCTGCTTGTCGACTCAGATCTTAATGACTTTGTC	2535
		R G614D	GAATAGCAACAGGGACTTCTGTGCAGTTAACATCCTGATAAAGAACAGCAACCTGGTTAGAAGTATTTGTTCC
	D2 614	F G614D	AACACCAGGAACAAATACTTCTAACCAGGTTGCTGTTCTTTATCAGGATGTTAACTGCACAGAAGTCCCTGTTGCTATTC	6774
		R SV40	GCGGCCGCCAGACATGATAAG
	D1 501	F D-C	TACAGCTGTTTTAAGACAGTGGTTGCCTACGGGTACGCTGCTTGTCGACTCAGATCTTAATGACTTTGTC	2212
		R N501Y	AGTTCAAAAGAAAGTACTACTACTCTGTATGGTTGGTAACCAACACCATAAGTGGGTTGGAAACCATATG
	D2 501	F N501Y	AAGGTTTTAATTGTTACTTTCCTTTACAATCATATGGTTTCCAACCCACTTATGGTGTTGGTTACCAACCATAC	7117
		R SV40	GCGGCCGCCAGACATGATAAG
	D1 ∆ORF3a	F D-C	TACAGCTGTTTTAAGACAGTGGTTGCCTACGGGTACGCTGCTTGTCGACTCAGATCTTAATGACTTTGTC	4495
		R ΔORF3a	CCTGTCTCTTCCGAAACGAATGAGTACATAAGTTCGTACTCATCAGCTTGTGCTTATGTGTAATGTAATTTGACTCC
	D2 ∆ORF3a	F ΔORF3a	ACGACTCTGAGCCAGTGCTCAAAGGAGTCAAATTACATTACACATAAGCACAAGCTGATGAGTACGAACTTATGTACTC	3912
		R SV40	GCGGCCGCCAGACATGATAAG
	D1 ORF8-3xFLAG	F D-C	TACAGCTGTTTTAAGACAGTGGTTGCCTACGGGTACGCTGCTTGTCGACTCAGATCTTAATGACTTTGTC	7356
		R ORF8-3xFLAG	TTACTTGTCATCGTCATCCTTGTAATCGATGTCATGATCTTTATAATCACCGTCATGGTCTTTGTAGTCAGAACCACCTCCGCCGATGAAATCTAAAACAACACG
	D2 ORF8-3xFLAG	F ORF8-3xFLAG	GGCGGAGGTGGTTCTGACTACAAAGACCATGACGGTGATTATAAAGATCATGACATCGATTACAAGGATGACGATGACAAGTAAACGAACAAACTAAAATGTCTG	1873
		R SV40	GCGGCCGCCAGACATGATAAG
	linker	F linker	AGGCCACGCGGAGTACGATCGAGTGTACAGTGAACAATGCTAGGGAGAGCTGCC	1106
			or
			TGCTAGGGAGAGCTGCC (equal performance)
		R linker	CAGCCGAGTGACAGCCACAC
	A1-linker	F A-linker	GTTTAGTGAACCGTATATTAGGTTTATACCTTCCCAGGTAACAAACC	4083
		R A1-A2	GGCAGAATCTGGATGAAGATTGCC
	D2-linker	F D2-D1	GGAACTGTAACTTTGAAGCAAGGTG	4451
		R D-linker	TTTGTCATTCTCCTAAGAAGCTATTAAAATCACATG
	D1 500	F D-C	TACAGCTGTTTTAAGACAGTGGTTGCCTACGGGTACGCTGCTTGTCGACTCAGATCTTAATGACTTTGTC	500
		R 500	TCATGTCAAATAAAGAATAGGAAGACAACTG
	D2 500	F 500	CCACGCGAACAAATAGATGGTTATG	8829
		R SV40	GCGGCCGCCAGACATGATAAG
CHIKV	fr1	F fr1-linker CHIKV	GGCGTGTACGGTGGGAGGTCTATATAAGCAGAGCTCGTTTAGTGAACCGTATGGCTGCGTGAGACACACG	6128
		R fr1-fr2 CHIKV	ATG AGA CAG TTG GAT AGT TTC TAG CTA AGA ACT CAT TGC ATG CTG CCA CAG CGG ACT CGG GAT TGG AC
	fr2	F fr2_fr1 CHIKV	CCT GTG TAC TCG CCT CCG ATC AAC GTC CGA TCG TCC AAT CCC GAG TCC GCT GTG GCA GCA TGC AAT GAG	3157
		R fr2-fr3 CHIKV	CGCACCGTCTGGCCATTGACTGTGATCTTTACGTTGCCGGACTGTTGTGACATTAATGTGCGATCAGGGGTG
	fr3	F fr3-fr2 CHIKV	CGTGCAGAGCACCGCCGCAACTACCGAAGAGATAGAGGTACACATGCCCCCAGACACCCCTGATCGCAC	2816
		R fr3-linker CHIKV	AGCGAGGAGGCTGGGACCATGCCGGCCTTTTTTTTTTTTTTTTTTTTTTTTTTTTTTTTTTTTGAAATATTAAAAACAAAATAACATCTCC
	linker CHIKV	F linker-fr3 CHIKV	AGGGACGTAGGAGATGTTATTTTGTTTTTAATATTTCAAAAAAAAAAAAAAAAAAAAAAAAAAAAAAAAAAAAGGCCGGCATGGTCCCAG	1009
		R linker-fr1 CHIKV	CTTGCTTTGCAGAGTAGAGCAGTAAGAAACTGGTAGGCTACGTGTGTCTCACGCAGCCATACGGTTCACTAAACGAGC
DENV	linker DENV1	F linker-fr2_DENV1	CCA GAA AAT GGA ATG GTG CTG TTG AAT CAA CAG GTT CTA AAA AAA AAA AAA AAA AAA AAA AAA AAA AAA AAA AGG CCG GCA TGG TCC CAG	989
		R linker-fr1_DENV1	GCA AGC TTC CGA TTC GAA ACT GTT CTT GTC GGT CCA CGT AGA CTA ACA ACT CGG TTC ACT AAA CGA GC
	fr1 mA	F fr1-linker_DENV1	GGC GTG TAC GGT GGG AGG TCT ATA TAA GCA GAG CTC GTT TAG TGA ACC GAG TTG TTA GTC TAC GTG GAC C	5612
		R fr1-fr2 DENV1 A	CCT GAG TTC CAT GAT CTC TCA GGA ATG TCT CTT TCC TCA TCT TGG ATA ACG GCA TTG CTC TGT GGA AAG GCC TCC AC
	fr2 mA	F fr2-fr1 DENV1 A	TGA CAG CCA CTC CCC CAG GAT CGG TGG AGG CCT TTC CAC AGA GCA ATG CCG TTA TCC AAG ATG AGG AAA GAG	5335
		R fr2-linker_DENV1	AGCGAGGAGGCTGGGACCATGCCGGCCTTTTTTTTTTTTTTTTTTTTTTTTTTTTTTTTTTTAGAACCTGTTGATTCAACAGCACCATTCCATTTTCTGGCGTTCTGTGCCTGGAATGAT
	fr1 mB	F fr1-linker_DENV1	GGC GTG TAC GGT GGG AGG TCT ATA TAA GCA GAG CTC GTT TAG TGA ACC GAG TTG TTA GTC TAC GTG GAC C	5534
		R fr1-fr2 DENV1 B	GAT CCT GGG GGA GTG GCT GTC ATG AAG ATC GCA GCT GCT TCA CCC ATG CCA ACT CGG GTT GAG ATG TAC CCT C
	fr2 mB	F fr2-fr1 DENV1 B	TCA CCG ATC CAG CCA GCA TAG CGG CCA GAG GGT ACA TCT CAA CCC GAG TTG GCA TGG GTG AAG CAG CTG C	5413
		R fr2-linker_DENV1	AGCGAGGAGGCTGGGACCATGCCGGCCTTTTTTTTTTTTTTTTTTTTTTTTTTTTTTTTTTTAGAACCTGTTGATTCAACAGCACCATTCCATTTTCTGGCGTTCTGTGCCTGGAATGAT
	linker DENV3	F linker-fr2 DENV3	CCA GAA AAT GGA ATG GTG CTG TTG AAT CAA CAG GTT CTA AAA AAA AAA AAA AAA AAA AAA AAA AAA AAA AAA AGG CCG GCA TGG TCC CAG	989
		R linker-fr1 DENV3	GCA AGC TTC CGA GTC GAA ACT GTT CTT GTC GGT CCA CGT AGA CTA ACA ACT CGG TTC ACT AAA CGA GC
	fr1	F fr1-linker DENV3	GGC GTG TAC GGT GGG AGG TCT ATA TAA GCA GAG CTC GTT TAG TGA ACC GAG TTG TTA GTC TAC GTG GAC C	6450
		R fr1-fr2 DENV3	CTA TTT CTG TCA CAA GAT CAA GGG CGA TTG ACT TTC TAC CGG CCG CAA AGT CCT TGA ATT CCT TGA GTG CTA AGG GAT CTG AAT AAG
	fr2	F fr2-fr1 DENV3	CTT GAT GCC CGC ACT TAT TCA GAT CCC TTA GCA CTC AAG GAA TTC AAG GAC TTT GCG GCC GGT AGA AAG TCA ATC GCC CTT GAT CTT GTG AC	4468
		R fr2-linker_DENV3	AGCGAGGAGGCTGGGACCATGCCGGCCTTTTTTTTTTTTTTTTTTTTTTTTTTTTTTTTTTTAGAACCTGTTGATTCAACAGCACCATTCCATTTTCTGGCGTTCTGTGCCTGGAATGAT
