# Supplementary material for: Rapid cloning-free mutagenesis of new SARS-CoV-2 variants using a novel reverse genetics platform
Source: eLife. 2023 Nov 21;12:RP89035. doi: 10.7554/eLife.89035 (PMC10662946; doi:10.7554/eLife.89035)
Supplement: Supplementary file 6. [file elife-89035-supp6.xlsx]

## Sheet: Sheet1
Supplementary File 6. PCR settings for individual fragments.
	Fragment	Cycling Conditions	Elongation
SARS-CoV-2	A	5 cycles at 57 °C	4 min 40 s
		20 cycles at 65 °C
	B	5 cycles at 47 °C	3 min 20 s
		20 cycles at 65 °C
	C	5 cycles at 54 °C	3 min
		20 cycles at 65 °C
	D	5 cycles at 50 °C	4 min 20 s
		20 cycles at 65 °C
	A1	5 cycles at 52 °C	2 min 30 s
		20 cycles at 64 °C
	A2	5 cycles at 52 °C	2 min 30 s
		20 cycles at 64 °C
	B1	5 cycles at 48 °C	1 min 45 s
		20 cycles at 63 °C
	B2	5 cycles at 48 °C	1 min 45 s
		20 cycles at 63 °C
	C1	5 cycles at 48 °C	1 min 45 s
		20 cycles at 63 °C
	C2	25 cycles at 61 °C	1 min 45 s
	D1	25 cycles at 63 °C	2 min 30 s
	D2	5 cycles at 52 °C	2 min 30 s
		20 cycles at 64 °C
	linker	25 cycles at 58 °C	35 s
CHIKV	linker CHIKV	5 cycles at 54 °C	30 s
		20 cycles at 64 °C
	fr1 CHIKV	25 cycles at 64 °C	3 min 10 s
	fr2 CHIKV	25 cycles at 62 °C	1 min 40 s
	fr3 CHIKV	25 cycles at 61 °C	1 min 30 s
DENV	linker DENV1	5 cycles at 52 °C	30 s
		20 cycles at 62 °C
	fr1 DENV1 A	5 cycles at 55 °C	2 min 50 s
		20 cycles at 62 °C
	fr2 DENV1 A	5 cycles at 50 °C	2 min 50 s
		20 cycles at 62 °C
	fr1 DENV1 B	5 cycles at 55 °C	2 min 50 s
		20 cycles at 62 °C
	fr1 DENV1 B	5 cycles at 50 °C	2 min 50 s
		20 cycles at 62 °C
	linker DENV3	5 cycles at 52 °C	30 s
		20 cycles at 62 °C
	fr1 DENV3	5 cycles at 50 °C	3 min 20 s
		20 cycles at 62 °C
	fr2 DENV3	5 cycles at 50 °C	2 min 20 s
		20 cycles at 62 °C
