# Supplementary figures and images for: Rapid cloning-free mutagenesis of new SARS-CoV-2 variants using a novel reverse genetics platform
Source: eLife journal article supplement (doi:10.7554/elife.89035), 2023-08-11

Figure 1

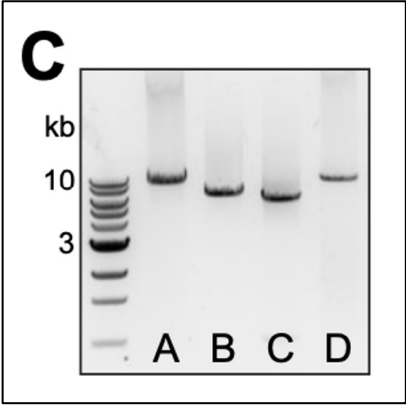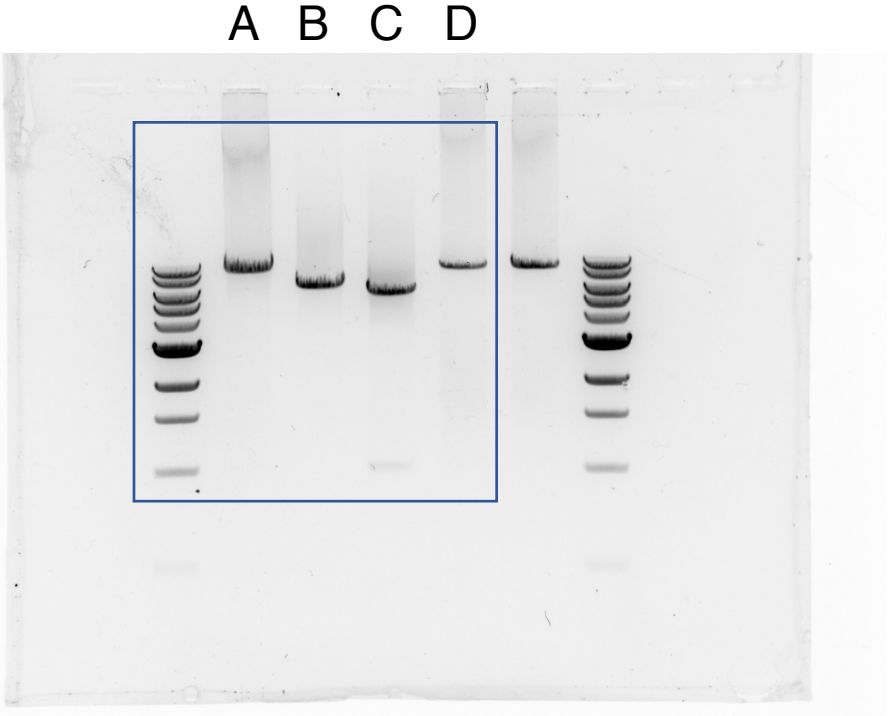

Supplement: fig1-data1 [file elife-89035-fig1-data1-v1.zip]

Figure 4

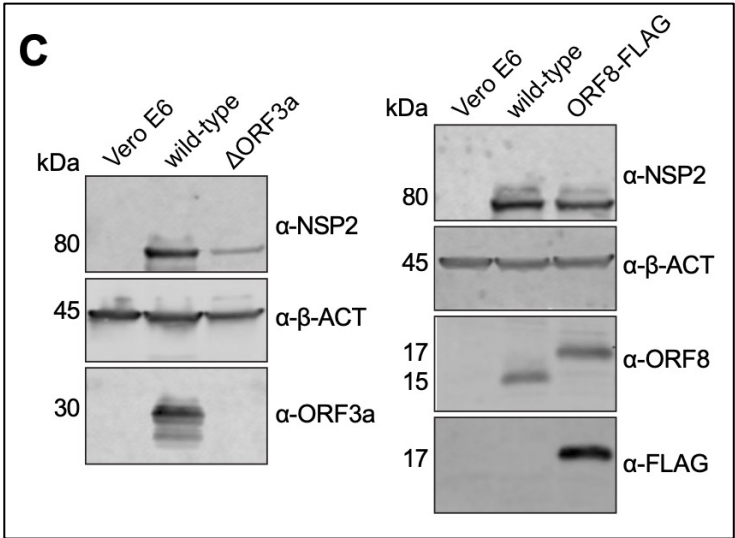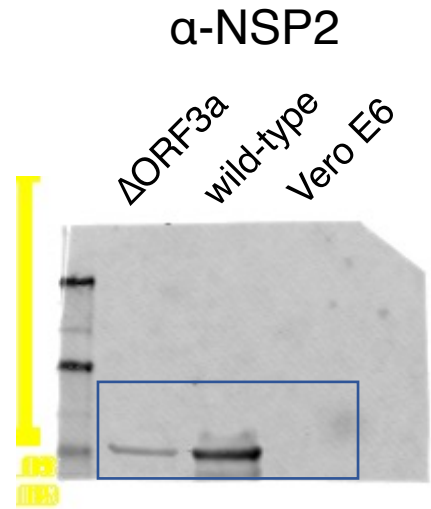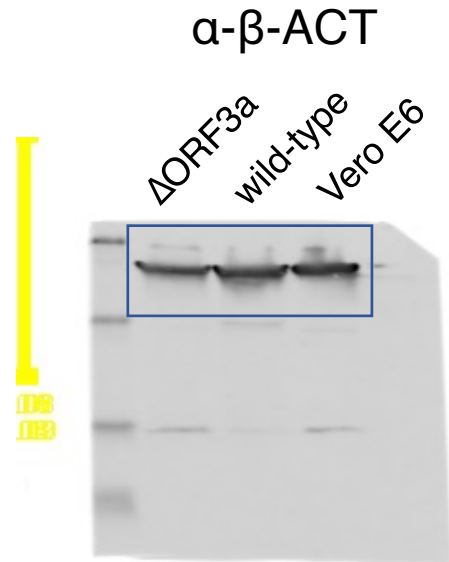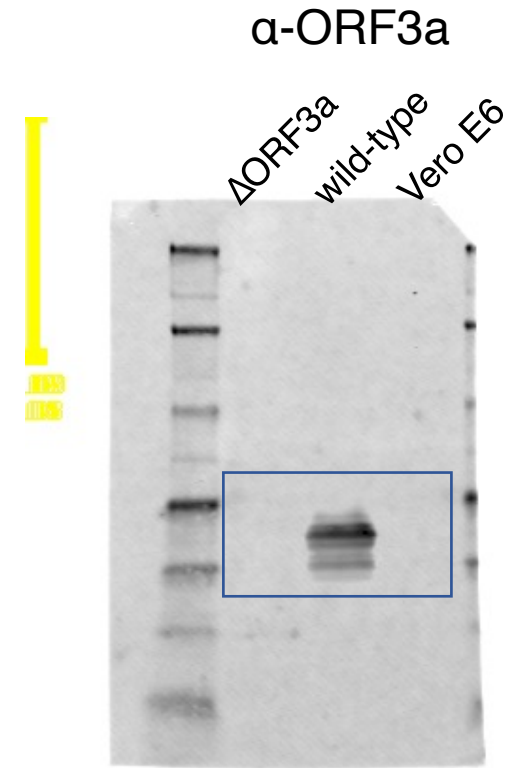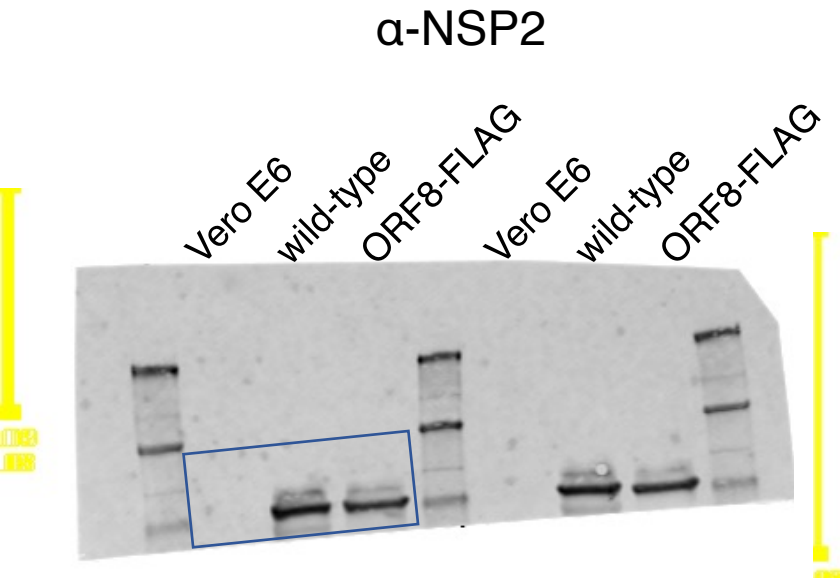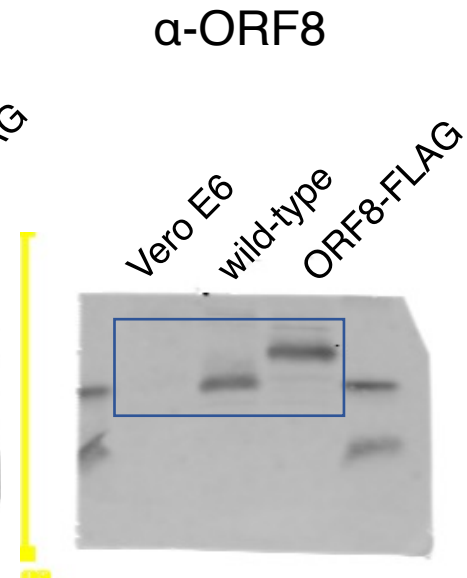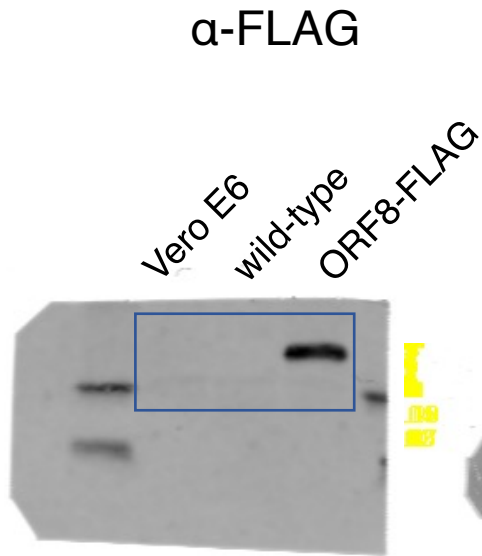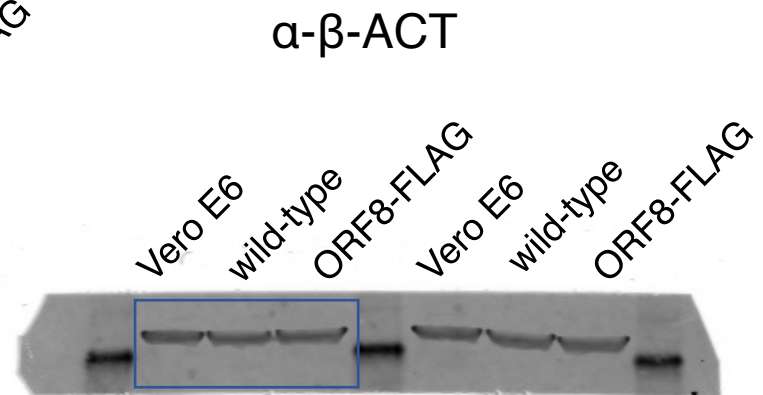

Supplement: fig4-data1 [file elife-89035-fig4-data1-v1.zip]

Figure 5

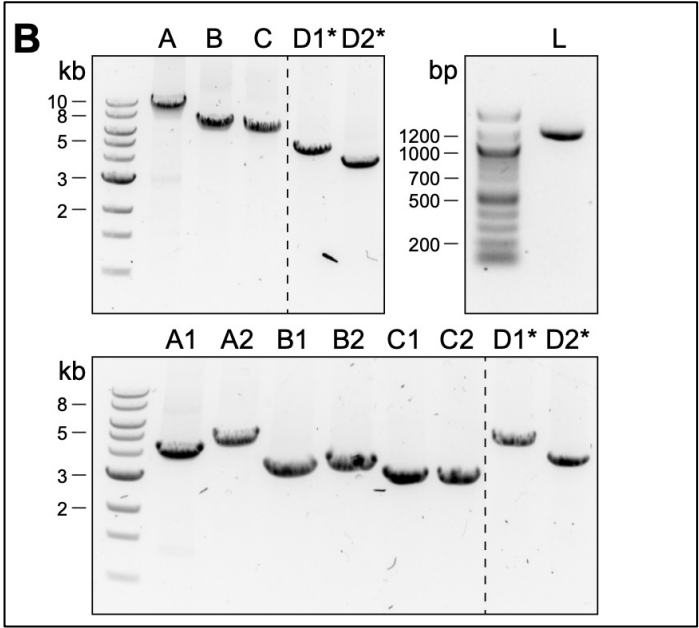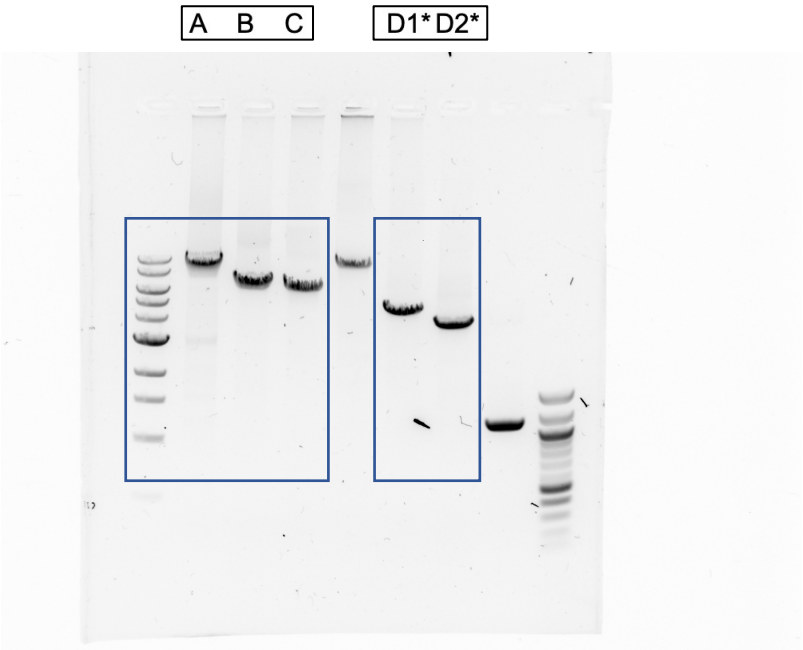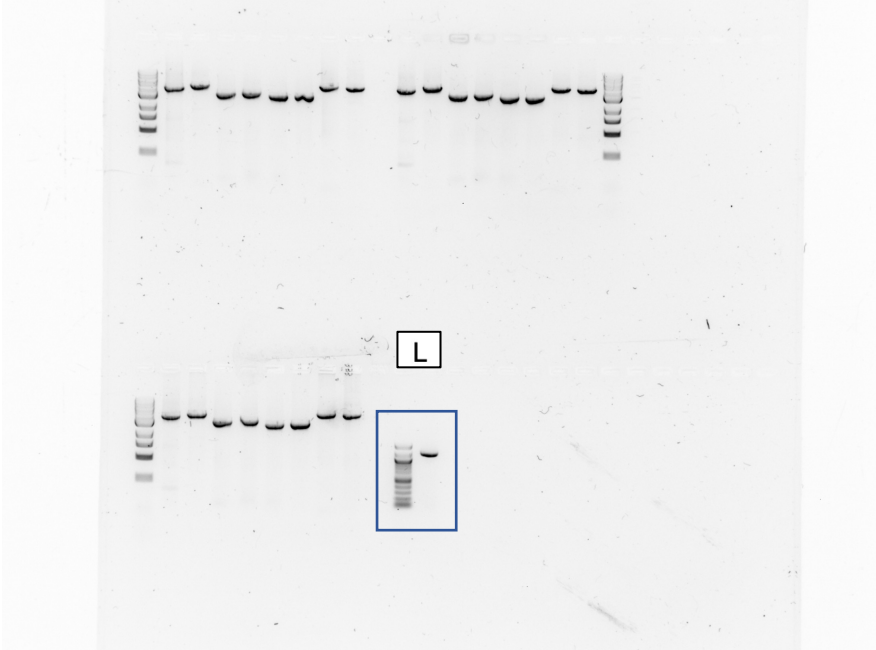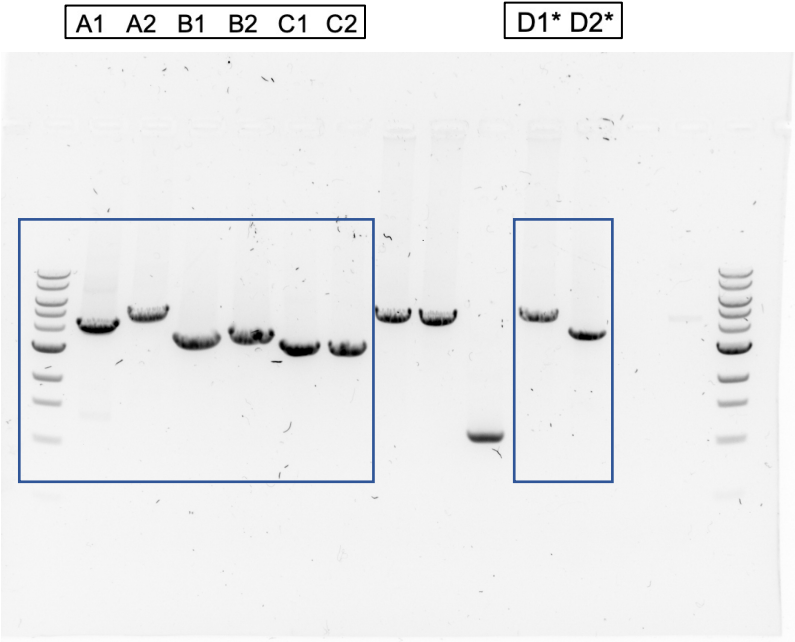

Supplement: fig5-data1 [file elife-89035-fig5-data1-v1.zip]
